1 **Overweight and Obesity among Women at Reproductive Age in Cambodia: Data Analysis**  
2 **of Cambodia Demographic and Health Survey 2014**

3

4 **Samnang Um<sup>1\*</sup>, An Yom<sup>1</sup>, Jonathan A. Muir<sup>2</sup>, Heng Sopheab<sup>1</sup>**

5

6 1- School of Public Health at the National Institute of Public Health, Cambodia

7 2- The Global Health Institute, Emory University, Atlanta, Georgia, United States

8

9 \*Corresponding authors: Samnang Um, email: [umsamnang56@gmail.com](mailto:umsamnang56@gmail.com),

10 [ORCID: <https://orcid.org/0000-0002-1521-1260>],

11 An Yom, email: [anyomniph@gmail.com](mailto:anyomniph@gmail.com),

12 Jonathan A. Muir, email: [jamuir@emory.edu](mailto:jamuir@emory.edu)

13 [ORCID: <https://orcid.org/0000-0002-8039-7145>]

14 Heng Sopheab, email: [hsopheab@niph.org.kh](mailto:hsopheab@niph.org.kh),

15 [ORCID: <https://orcid.org/0000-0002-6553-1334>]

16 Address: Lot#80, 289 Samdach Penn Nouth St. (289), Phnom Penh

17

18

19 **ABSTRACT**

20

21 **Introduction**

22 Overweight and obesity increase the risk of cardiovascular disease, type 2 diabetes mellitus,  
23 hypertension, stroke, and some type of cancers, and maternal health globally. In Cambodia, the  
24 prevalence of overweight and obesity among women aged 15-49 years increased from 6% in  
25 2000 to 18% in 2014, becoming a public health burden. We examined socio-demographic and  
26 behavioral factors associated with overweight and/or obesity among women of reproductive age  
27 in Cambodia.

28

29 **Methods**

30 We analyzed existing data from the 2014 Cambodia Demographic and Health Survey (CDHS)  
31 that used a two-stage stratified cluster sampling design. Data analysis was restricted to non-  
32 pregnant women, resulting in an analytic sample of 10,818 women. Multivariable logistic  
33 regressions that accounted for the CDHS sampling design were performed using STATA V16 to  
34 examine factors associated with overweight and obesity.

35

36 **Results**

37 Prevalence of overweight and obesity among non-pregnant women of reproductive age were  
38 15.2% and 2.8% respectively. Factors independently associated with increased odds of  
39 overweight and/or obesity including women aged 20-29 years with adjusted odds ratio  
40 [AOR=2.4; 95% CI: 1.6-3.6], 30-39 years [AOR=4.6; 95% CI: 3.0-6.9], and 40-49 years  
41 [AOR=6.6; 95% CI: 4.3-10.1], married women [AOR=1.8; 95% CI: 1.3-2.7], urban residence  
42 [AOR=1.3; 95% CI: 1.1-1.5], and women having at least 4 children [AOR=1.7; 95% CI: 1.2-  
43 2.5]. The following factors were associated with decreased odds of overweight and obesity:  
44 completed at least secondary education [AOR=0.7; 95% CI: 0.6-0.8], agricultural work  
45 [AOR=0.7; 95% CI: 0.5-0.8], and manual labor work [AOR=0.7; 95% CI: 0.6-0.9].

46

47 **Conclusions**

48 Increased age, married women, living in urban residence, and having at least four children were  
49 the main risk factors associated with overweight and/or obesity. Conversely, higher education,  
50 working in agriculture, and working in manual labor were negatively associated with overweight  
51 and/or obesity. Cambodia's non-communicable disease (NCD) public health programs should  
52 consider these characteristic for targeting interventions to further reduce overweight and/or  
53 obesity in the coming years.

54

55 **Keywords:** Overweight, obesity, non-communicable diseases, NCDs, women at reproductive  
56 age, CDHS, Cambodia

57

## 58 **Introduction**

59  
60 Obesity or being overweight is associated with increased risk of cardiovascular disease, type 2  
61 diabetes mellitus, systemic hypertension, obstructive sleep apnea, stroke, and some type of  
62 cancers, and maternal disorders among women of reproductive age (WRA) [1, 2]. According to  
63 the WHO, overweight and obesity are leading risks for global deaths with at least 2.8 million  
64 adults dying annually due to these conditions [3]. Globally, 2 billion adults aged 18 years and  
65 older were overweight, and 650 million were obese in 2016 [3]. In both developed and  
66 developing countries, obesity or being overweight were higher in women than men; for instance,  
67 obesity was 15% in women compared to 11% in men [2, 3]. The Global Nutrition Report 2019  
68 showed that 26.1% of women and 20.4% of men were overweight, while obesity was 6.3% in  
69 women compared to 3.5% in men [4]. The final report for the 2104 Cambodia Demographic and  
70 Health Survey (CDHS) indicated that overweight and obesity increased from 6% in 2000 to 18%  
71 in 2014 [5]. It was estimated that overweight and obesity contribute to rising healthcare costs in  
72 Cambodia (approximately 1.7% of its annual gross domestic product (GDP) per capita) and is a  
73 major contributor to mortality and decreased general health and productivity [6].

74  
75 Factors commonly associated with overweight and obesity among women include higher  
76 socioeconomic status, older age, marriage, living in an urban residence, and lack of education [7,  
77 8]. Women with formal employment had higher odds of being overweight or obese than  
78 informally employed women [9]. Also, women who used hormonal contraceptives such as oral  
79 contraceptive pills, implants, patches, and rings were at higher risk of being overweight or obese  
80 [10]. Globally, 30% of daily smokers are overweight or obese [11], with women smokers at  
81 greater risk for overweight or obesity than men smokers [12, 13]. While health scholars have  
82 examined these factors internationally, to our knowledge, factors associated with overweight and  
83 obesity specifically among WRA in Cambodia have not been explored. Therefore, we examined  
84 socio-demographic and behavioral factors associated with overweight and/or obesity among  
85 WRA.

86

## 87 **Materials and Methods**

88

89 **Ethics Statement**

90 The data used in this study were extracted from CDHS 2014 data [14], which are publicly  
91 available with all personal identifiers of study participants removed. Permission to analyze the  
92 data was granted through registering with the DHS program website and submitting an  
93 application outlining the intended use of the datasets [14]. Informed consent was obtained from  
94 the study participants before data collection. The data collection tools and procedures for CHDS  
95 2014 was approved by the Cambodia National Ethics Committee for Health Research (Ref: #  
96 056 NECHR) and the Institutional Review Board (IRB) of ICF in Rockville, Maryland, USA.

97

98 **Data sources and procedures**

99

100 We used the women's dataset from CDHS 2014, which was a nationally representative  
101 population-based household survey. Survey data were obtained through face-to-face survey  
102 interviews using a formal survey instrument by trained interviewers. Two-stage stratified cluster  
103 sampling was used to collect the samples. In the first stage, enumeration areas (EAs) stratified by  
104 urban-rural were selected from the sampling frame using probability proportional to cluster size.  
105 In the second stage, a defined number of households, generally 25-30, were selected from the list  
106 of households in each EA using the systematic sampling [5]. Eligible WRA in selected  
107 households were invited to complete a survey interview. In total, 17,578 women aged 15-49  
108 years were interviewed. Weight and height measurements for women were taken by trained  
109 female field staff using standardized instruments and procedures [5]. Height in centimeters (cm),  
110 measured using standardized measuring boards with accuracy to 0.1 cm, and weight in kilograms  
111 (kg), measured using solar-powered scales (UNICEF electronic scale or Uniscale) with accuracy  
112 to 0.1 kg [5]. Data quality assurance and cleaning followed standard operating procedures, which  
113 cover every step of the research process, from data collection to data entry [15]. The data were  
114 restricted to only include non-pregnant women aged 15-49 years with available body mass index  
115 (BMI) data, resulting in the exclusion of 974 pregnant women and 5,786 women with missing  
116 BMI data. Data restriction resulted in a final analytic sample of 10,818 WRA.

117

118 **Outcome variable**

119

120 The outcome variable of this study was **Overweight/Obese** for WRA. For the outcome variable  
121 **Overweight/Obese**, BMI was first calculated as weight in kilograms divided by the square of  
122 height in meters ( $\text{kg/m}^2$ ) [16]. BMI was then measured as follows: underweight  
123 ( $< 18.0 \text{ kg/m}^2$ ), normal weight ( $18.5\text{-}24.9 \text{ kg/m}^2$ ), overweight ( $25.0\text{-}29.9 \text{ kg/m}^2$ ) and obesity  
124 ( $\geq 30.0 \text{ kg/m}^2$ ) [5]. **Overweight/Obese** was defined as a binary outcome for which women with  
125 a BMI  $\geq 25.0 \text{ kg/m}^2$  were classified as overweight and obese (coded = 1), while women with a  
126 BMI  $< 25.0 \text{ kg/m}^2$  were coded as other (coded = 0).

127

### 128 **Explanatory variables**

129

130 Explanatory variables included socio-demographic characteristics and behavioral factors:  
131 Women's age in years (15-19, 20-29, 30-39, and 40-49), marital status (not married, married or  
132 living together, and divorced or widowed or separated), education level (no education, primary,  
133 secondary and higher), occupation (not working, agriculture, manual labor or unskilled,  
134 professional or sealer or services). Households' wealth status was represented by a wealth index  
135 calculated via principal component analysis (PCA) and using variables for household assets and  
136 dwelling characteristics. Weighted scores divided into five wealth quintiles (poorest, poorer,  
137 medium, richer, and richest) each comprising 20% of the population [5, 15, 16]. Then, the  
138 original variable was then recombined into three categories including richer/richest, middle, and  
139 poorer/poorest. Residence (urban vs. rural), number of children ever born (no children, one child,  
140 two-three children, four and more children), smoking (non-smoker vs smoker), contraceptive  
141 usage (not used, hormonal methods (using a pill, Norplant, injection, and vaginal rings), non-  
142 hormonal methods (condoms, the diaphragm, the IUD, spermicides, lactational amenorrhea, and  
143 sterilization), and traditional methods (periodic abstinence and withdrawal).

144

### 145 **Statistical analysis**

146

147 Data analyses were performed using STATA version 16 (Stata Corp 2017, College Station, TX)  
148 and accounted for the CDHS sampling weights and complex survey design. Socio-demographic  
149 characteristics and behavioral factors were described in weighted frequency and percentage.  
150 Descriptive analyses that coupled cross-tabular frequency distributions with chi-square tests were

151 used to assess associations between explanatory variables and the outcome variable  
152 **Overweight/Obese**. Variables associated with the outcome variable with a significance level of  
153  $p\text{-value} \leq 0.10$  or that had theoretical justification (for example, women's age, wealth index, and  
154 residence) were included in the unadjusted and adjusted logistic regression analyses [17-19].

155  
156 Unadjusted logistic regression was used to determine the magnitude effect of associations  
157 between overweight and obesity with socio-demographic characteristics and behavioral factors  
158 reported as odds ratios (OR) with 95% confidence intervals (CI). Then, adjusted logistics  
159 regression was used to assess independent associations, reported as adjusted odds ratios (AOR),  
160 with overweight and obesity after adjusting for other independent variables included in the  
161 model. Multicollinearity was checked for some original variables including women's age and  
162 the number of children ever born, education, and wealth index.

163

164

## 165 **Results**

166

### 167 **Characteristics of the study samples**

168

169 The mean age of women was 30 years old (SD = 9.9 years) in which age group 20-39 years old  
170 accounted for 60.4%. Almost 66.0% were married; 48.4% had completed primary education and  
171 13.6% did not receive formal schooling. A total of 34.2% of women did agricultural work,  
172 21.4% were unemployed. Of the total sample, 36.4% women were from the poor households.  
173 The majority (80.7%) of women resided in rural areas. More than one third had two to three  
174 children while 31% had no children. Only 2.2% of women reported cigarette smoking, 7.2%  
175 reported using hormonal contraceptives. Mean women's BMI was 22 kg/m<sup>2</sup> (SD = 3.6 kg/m<sup>2</sup>)  
176 and 15.2% and 2.8% were overweight and obese respectively (**Table 1**).

177

178

179

180

181

182

183 **Table 1.** Socio-demographic and behaviors characteristics of the weighted samples of women  
 184 aged 15-49 years old in Cambodia, 2014 (n=10,765, weighted count)

| Variables                                | Freq. | %           |
|------------------------------------------|-------|-------------|
| <b>Women's mean age in years (SD)</b>    |       | 30.0 (9.9)  |
| 15-19                                    | 1741  | 16.2        |
| 20-29                                    | 3553  | <b>33.0</b> |
| 30-39                                    | 2946  | 27.4        |
| 40-49                                    | 2526  | 23.5        |
| <b>Marital status</b>                    |       |             |
| Not married                              | 2846  | 26.4        |
| Married or living together               | 7096  | <b>65.9</b> |
| Widowed/divorced/separated               | 823   | 7.6         |
| <b>Education</b>                         |       |             |
| No education                             | 1459  | <b>13.6</b> |
| Primary                                  | 5214  | 48.4        |
| Secondary and higher                     | 4092  | 38.0        |
| <b>Current work status</b>               |       |             |
| Not working                              | 2307  | 21.4        |
| Agricultural                             | 3681  | <b>34.2</b> |
| Professional                             | 2585  | 24.0        |
| Manual labor and unskilled               | 2190  | 20.3        |
| <b>Wealth index</b>                      |       |             |
| Poor                                     | 3915  | <b>36.4</b> |
| Middle                                   | 2064  | 19.2        |
| Rich                                     | 4786  | 44.5        |
| <b>Place of residence</b>                |       |             |
| Rural                                    | 8687  | <b>80.7</b> |
| Urban                                    | 2078  | 19.3        |
| <b>Number of children born</b>           |       |             |
| 0                                        | 3321  | 30.9        |
| 1                                        | 1721  | 16.0        |
| 2-3                                      | 3553  | 33.0        |
| 4+                                       | 2170  | <b>20.2</b> |
| <b>Smoking status</b>                    |       |             |
| Non smoker                               | 10530 | 97.8        |
| Smoker                                   | 235   | <b>2.2</b>  |
| <b>Ever report of contraceptive use</b>  |       |             |
| No method                                | 6399  | <b>59.4</b> |
| Traditional method                       | 2223  | 20.6        |
| Non-hormonal method                      | 1370  | 12.7        |
| Hormonal method                          | 774   | 7.2         |
| <b>BMI mean in kg/m<sup>2</sup> (SD)</b> |       | 22.0 (3.6)  |
| Underweight                              | 1501  | 13.9        |
| Normal weight                            | 7327  | 68.1        |
| Overweight                               | 1637  | <b>15.2</b> |
| Obese                                    | 300   | <b>2.8</b>  |



185 **Factors associated with overweight and obesity in bivariate analysis**

186  
187 Socio-demographic characteristics were significantly associated with overweight and obesity  
188 (**Table 2**). Women had higher prevalence of overweight/obesity if they were aged 40-49 years  
189 (31%) compared to younger age groups, (p value <0.001), married (22.9%) compared to other  
190 relationship status (p value <0.001), had no education (22.4%) compared to higher education (p  
191 value <0.001), were employed in a professional job (28.4%) compared to other jobs, or were  
192 from the rich households (21.4%) compared to poor households (p value <0.001). In addition,  
193 women who lived in urban areas had a higher prevalence of overweight and obesity than those  
194 living in rural areas (22.4% vs 16.9%, p value <0.001). Overweight/obesity increased with  
195 parity. Women reported at least four children had a significantly highest overweight and obesity  
196 (29.3%), (p value < 0.001). Likewise, women used non-hormonal contraceptives methods had a  
197 significant higher proportion of overweight and obesity (27.7%) than women using other  
198 methods (p value <0.019).

199

200 **Factors associated with overweight and obesity in adjusted logistic regression**

201  
202 As shown in **Table 3**, several factors were independently associated with increased odds of  
203 having overweight and obesity among women. These factors included age group 20-29 years  
204 [AOR=2.4; 95% CI: 1.6-3.6], 30-39 years [AOR=4.6; 95% CI: 3.0-6.9] and 40-49 years  
205 [AOR=6.6; 95% CI: 4.3-10.1] married [AOR=1.8; 95% CI: 1.3-2.7], women who had  
206 professional job [AOR=1.3; 95% CI: 1.0-1.5], living in urban residence [AOR=1.3; 95% CI: 1.1-  
207 1.5], middle wealth quintile [AOR=1.4; 95% CI :1.1-1.8], and rich wealth quintile [AOR=1.8 ;  
208 95% CI: 1.5-2.1], having at least two-three children or more. On the contrary, following factors  
209 were independently associated with decreased odds of having overweight and obese: women  
210 with higher education [AOR=0.7; 95% CI: 0.6-0.8], working in agricultural jobs [AOR=0.7;  
211 95% CI: 0.5-0.8], and in manual labor jobs [AOR=0.7; 95% CI: 0.6-0.9].

212

213

214

215

216 **Table 2.** Factors associated with overweight and obesity among women aged 15-49 years in Chi<sup>2</sup>  
 217 analysis (n = 10,765, weighted count)

| Characteristics                         | Overweight/Obese |             | Normal/Underweight |      | p-value          |
|-----------------------------------------|------------------|-------------|--------------------|------|------------------|
|                                         | Freq.            | %           | Freq.              | %    |                  |
| <b>Women's age group in years</b>       |                  |             |                    |      |                  |
| 15-19                                   | 51               | 2.9         | 1690               | 97.0 |                  |
| 20-29                                   | 390              | 11.0        | 3162               | 89.0 | <b>&lt;0.001</b> |
| 30-39                                   | 705              | 24.0        | 2241               | 76.0 |                  |
| 40-49                                   | 790              | <b>31.0</b> | 1735               | 69.0 |                  |
| <b>Marital status</b>                   |                  |             |                    |      |                  |
| Not married                             | 159              | 5.6         | 2688               | 94.4 |                  |
| Married or living together              | 1628             | <b>22.9</b> | 5468               | 77.1 | <b>&lt;0.001</b> |
| Widowed/divorced/separated              | 151              | 18.3        | 672                | 81.7 |                  |
| <b>Education</b>                        |                  |             |                    |      |                  |
| No education                            | 327              | <b>22.4</b> | 1132               | 77.6 |                  |
| Primary                                 | 1051             | 20.2        | 4164               | 79.8 | <b>&lt;0.001</b> |
| Secondary and higher                    | 559              | 13.7        | 3532               | 86.3 |                  |
| <b>Current work status</b>              |                  |             |                    |      |                  |
| Not working                             | 381              | 16.5        | 1926               | 83.5 |                  |
| Agricultural                            | 596              | 16.2        | 3085               | 83.8 |                  |
| Professional                            | 675              | <b>26.1</b> | 1910               | 73.9 | <b>&lt;0.001</b> |
| Manual labor and unskilled              | 285              | 13.0        | 1905               | 87.0 |                  |
| <b>Wealth index</b>                     |                  |             |                    |      |                  |
| Poor                                    | 543              | 13.9        | 3372               | 86.1 |                  |
| Middle                                  | 368              | 17.8        | 1696               | 82.2 | <b>&lt;0.001</b> |
| Rich                                    | 1026             | <b>21.4</b> | 3760               | 78.6 |                  |
| <b>Place of residence</b>               |                  |             |                    |      |                  |
| Rural                                   | 1470             | 16.9        | 7217               | 83.1 |                  |
| Urban                                   | 466              | <b>22.4</b> | 1612               | 77.6 | <b>&lt;0.001</b> |
| <b>Number of children ever born</b>     |                  |             |                    |      |                  |
| 0                                       | 215              | 6.5         | 3106               | 93.5 |                  |
| 1                                       | 238              | 13.8        | 1483               | 86.2 | <b>&lt;0.001</b> |
| 2-3                                     | 847              | 23.8        | 2706               | 76.2 |                  |
| 4+                                      | 636              | <b>29.3</b> | 1533               | 70.7 |                  |
| <b>Smoking status</b>                   |                  |             |                    |      |                  |
| Non smoker                              | 1907             | 18.1        | 8623               | 81.9 | 0.108            |
| Smoker                                  | 30               | 12.7        | 205                | 87.3 |                  |
| <b>Ever report of contraceptive use</b> |                  |             |                    |      |                  |

|                     |     |             |       |      |                  |
|---------------------|-----|-------------|-------|------|------------------|
| No method           | 964 | 15.1        | 5435  | 84.9 |                  |
| Traditional method  | 294 | 21.5        | 1076  | 78.6 |                  |
| Non-hormonal method | 214 | <b>27.7</b> | 559.2 | 72.3 | <b>&lt;0.001</b> |
| Hormonal method     | 465 | 20.9        | 1758  | 79.1 |                  |

218  
219  
220  
221 **Table 3.** Risk factors associated with overweight and obesity in unadjusted and adjusted logistic  
222 regression analysis

| Characteristics                     | Total (N=10,765) |           |         | Total (N=10,761) |                 |                  |
|-------------------------------------|------------------|-----------|---------|------------------|-----------------|------------------|
|                                     | OR               | 95% CI    | P value | AOR              | 95% CI          | P value          |
| <b>Women's age group in years</b>   |                  |           |         |                  |                 |                  |
| 15-19                               | 1.0              | Ref.      |         | 1.0              | Ref.            |                  |
| 20-29                               | 4.1              | 2.8-5.8   | <0.001  | <b>2.4</b>       | <b>1.6-3.6</b>  | <b>&lt;0.001</b> |
| 30-39                               | 10.4             | 7.3-14.6  | <0.001  | <b>4.6</b>       | <b>3.0-6.9</b>  | <b>&lt;0.001</b> |
| 40-49                               | 15.0             | 10.6-21.2 | <0.001  | <b>6.6</b>       | <b>4.3-10.1</b> | <b>&lt;0.001</b> |
| <b>Marital status</b>               |                  |           |         |                  |                 |                  |
| Not married                         | 1.0              | Ref.      |         | 1.0              | Ref.            |                  |
| Married or living together          | 5.0              | 4.2-6.1   | <0.001  | <b>1.8</b>       | <b>1.3-2.7</b>  | <b>0.002</b>     |
| Widowed/divorced/separated          | 3.8              | 2.9-5.0   | <0.001  | 1.1              | 0.7-1.7         | 0.638            |
| <b>Education level</b>              |                  |           |         |                  |                 |                  |
| No education                        | 1.0              | Ref.      |         | 1.0              | Ref.            |                  |
| Primary education                   | 0.9              | 0.7-1.0   | 0.150   | 0.9              | 0.8-1.1         | 0.495            |
| Secondary and higher                | 0.6              | 0.5-0.7   | <0.001  | <b>0.7</b>       | <b>0.6-0.8</b>  | <b>0.001</b>     |
| <b>Current work status</b>          |                  |           |         |                  |                 |                  |
| Not working                         | 1.0              | Ref.      |         | 1.0              | Ref.            |                  |
| Professional                        | 1.8              | 1.5-2.2   | <0.001  | <b>1.3</b>       | <b>1.0-1.5</b>  | <b>0.025</b>     |
| Agricultural                        | 1.0              | 0.8-1.2   | 0.827   | <b>0.7</b>       | <b>0.5-0.8</b>  | <b>0.001</b>     |
| Manual labor and unskilled          | 0.8              | 0.6-1.0   | 0.025   | <b>0.7</b>       | <b>0.6-0.9</b>  | <b>0.011</b>     |
| <b>Wealth index</b>                 |                  |           |         |                  |                 |                  |
| Poor                                | 1.0              | Ref.      |         | 1.0              |                 |                  |
| Middle                              | 1.4              | 1.1-1.7   | 0.009   | <b>1.4</b>       | <b>1.1-1.8</b>  | <b>0.003</b>     |
| Rich                                | 1.7              | 1.5-2.0   | <0.001  | <b>1.8</b>       | <b>1.5-2.1</b>  | <b>&lt;0.001</b> |
| <b>Place of residence</b>           |                  |           |         |                  |                 |                  |
| Rural                               | 1.0              | Ref.      |         | 1.0              | Ref.            |                  |
| Urban                               | 1.4              | 1.2-1.6   | <0.001  | <b>1.3</b>       | <b>1.1-1.5</b>  | <b>0.006</b>     |
| <b>Number of children ever born</b> |                  |           |         |                  |                 |                  |
| 0                                   | 1.0              | Ref.      |         | 1.0              | Ref.            |                  |

|                                     |     |         |        |            |                |              |
|-------------------------------------|-----|---------|--------|------------|----------------|--------------|
| 1                                   | 2.3 | 1.9-2.9 | <0.001 | 1.1        | 0.8-1.7        | 0.505        |
| 2-3                                 | 4.5 | 3.8-5.4 | <0.001 | <b>1.5</b> | <b>1.1-2.2</b> | <b>0.026</b> |
| 4+                                  | 6.0 | 4.9-7.3 | <0.001 | <b>1.7</b> | <b>1.1-2.5</b> | <b>0.008</b> |
| <b>Smoking status</b>               |     |         |        |            |                |              |
| Non smoker                          | 1.0 | Ref     |        | -          | -              |              |
| Smoker                              | 0.7 | 0.4-1.1 | 0.111  | -          | -              |              |
| <b>Ever report of contraceptive</b> |     |         |        |            |                |              |
| No method                           | 1.0 | Ref     |        | 1.0        | Ref            |              |
| Traditional method                  | 1.5 | 1.3-1.9 | <0.001 | 0.8        | 0.6-1.1        | 0.052        |
| Non-hormonal method                 | 2.2 | 1.7-2.7 | <0.001 | 1.0        | 0.8-1.3        | 0.769        |
| Hormonal method                     | 1.5 | 1.3-1.7 | <0.001 | 1.0        | 0.8-1.1        | 0.554        |

*OR: Unadjusted odds ratios, AOR: Adjusted odds ratios, 95% CI: 95% confidence interval*

223

224

225

226

## 227 Discussion

228

229 Factors associated with being overweight or obese for non-pregnant women include older age,  
 230 increased parity, marriage, urban residence, higher wealth, and working in a professional  
 231 occupation. Women with higher education as well as those working in agricultural or manual  
 232 labor were less likely to be overweight or obese.

233

234 Older aged women were more likely overweight or obese as compared to younger women aged  
 235 15-19 years. This is consistent with other studies that showed obesity was more prevalent in  
 236 older WRA [20]. The risk of women becoming overweight or obese rises with age, possibly due  
 237 to unhealthy food consumption and/or a lack of physical activity [21]. Women with higher  
 238 education are less likely to be overweight or obesity than women with no school due to increased  
 239 knowledge and awareness; for example, studies in Nigeria and South Korea reported that  
 240 educated women had a lower risk of being overweight or obese and that this may be linked to  
 241 education influencing healthy behavior [22-25]. Education is a critical predictor of women's  
 242 healthy behaviors and health outcomes, including diet, physical activity [26]. Women with better  
 243 socioeconomic status and who live in urban areas had higher odds of being overweight and  
 244 obese, which is consistent with prior research [27, 28]. Women living in urban areas with high

245 income may choose to use cars and other fuel-based vehicles; this convenience results in reduced  
246 physical activity and may also increase consumption of fast food. Women with higher  
247 socioeconomic status tend to use more improved technologies for a more comfortable lifestyle  
248 [29, 30]. Women have at least two and more children at risk of being overweight and obese,  
249 similar other studies [31]. During pregnancy, factors such as stress, depression, and/or anxiety  
250 may play a role in hypothalamic-pituitary-adrenal hyperactivity [32, 33]. Women with several  
251 children may also have gained weight as a result of their reduced physical activity and have less  
252 time to focus on health behaviors including weight management.

253  
254 This study has limitations. It was a cross-sectional study that does not indicate causality.  
255 Additionally, we used to exit secondary data that may result in omitted variable bias as other  
256 factors that may be relevant to overweight and obesity such as level of physical activity, dietary  
257 intake such as alcohol, sweet food, or soft drink consumption, family history, and awareness  
258 about overweight and obesity were not included in the analysis due to data limitations. Finally,  
259 these data were gathered in 2014 and may no longer reflect the present conditions of non-  
260 pregnant women in Cambodia. A subsequent study should further evaluate these relationships  
261 and the general prevalence of overweight and obesity among non-pregnant Cambodian women  
262 once additional data becomes available (the next round of data gathering of Cambodia DHS data  
263 is currently underway, but has experienced delays due to COVID-19). However, this study has  
264 several strengths. First, it draws upon a large, nationally representative sample with a high  
265 response rate of 97%. Data were collected using validated survey methods including calibrated  
266 measurement tools and highly trained data collectors, which contribute to improved data quality  
267 [15]. Formally incorporating the complex survey design and sampling weights into the analysis  
268 bolsters the rigor of the analysis and enables generalizing our findings to the population of non-  
269 pregnant women in Cambodia.

270  
271 Our results point to socio-demographic characteristics including older age, urban residence,  
272 higher education levels, higher income and wealth, and behavioral factors such as type of  
273 employment as risk factors associated with overweight and obesity among women of  
274 reproductive age in Cambodia. It is crucial to design intervention programs that target these  
275 socio-demographic factors and to raise awareness on the importance of consuming healthy food

276 as well as the benefits of regular physical activity, especially among older women and those with  
277 professional jobs.

## 278 **Acknowledgments**

279 The authors would like to thank DHS-ICF, who approved the data used for this paper.

280

## 281 **Authors' Contributions**

282 **Um S.** contributed to conceptualization, methods, data analysis, writing the original draft, and  
283 reviewing/editing the manuscript; **An Y.** contributed to writing and reviewing/editing the  
284 manuscript; **Sopheab H.** contributed to reviewing/editing the manuscript; **Jonathan M.**  
285 contributed to reviewing/editing the manuscript. All authors read and approved the final  
286 manuscript.

287

## 288 **Data Availability**

289 Our study used the 2014 Cambodia Demographic and Health Survey (CDHS) datasets. The DHS  
290 data are publicly available from the website: [https://www.dhsprogram.com/data/dataset\\_admin](https://www.dhsprogram.com/data/dataset_admin)

291

## 292 **Funding**

293 The authors received no funding support for this study.

## 294 **Competing interests**

295 The authors have declared that no competing interests exist.

296

## 297 **Abbreviations**

298

299 BMI, Body mass index; NCDs, Non-communicable diseases; WHO, World Health Organization;  
300 CDHS, Cambodia Demographic Health Survey; WRA, Women reproductive age; AOR,  
301 Adjusted odds ratio; PPS, Probability proportional to size. EA, Enumeration areas.

302

## 303 References

- 304
- 305 1. Leddy MA, Power ML, Schulkin J: **The impact of maternal obesity on maternal and fetal**
- 306 **health.** *Reviews in obstetrics and gynecology* 2008, **1**(4):170.
- 307 2. WHO: **World Health Organization, Noncommunicable diseases: Mortality;**
- 308 **[\[https://www.who.int/data/gho/data/themes/topics/topic-details/GHO/ncd-mortality\]](https://www.who.int/data/gho/data/themes/topics/topic-details/GHO/ncd-mortality);**
- 309 **Accessed on July 12, 2022.**
- 310 3. WHO: **World Health Organization, Obesity and overweight;** **[\[https://www.who.int/news-](https://www.who.int/news-room/fact-sheets/detail/obesity-and-overweight)**
- 311 **[room/fact-sheets/detail/obesity-and-overweight\]](https://www.who.int/news-room/fact-sheets/detail/obesity-and-overweight);** **Accessed on July 12, 2022.**
- 312 4. Report GN: **Country Nutrition Profiles:**
- 313 **[\[https://globalnutritionreport.org/resources/nutrition-profiles/asia/south-eastern-](https://globalnutritionreport.org/resources/nutrition-profiles/asia/south-eastern-)**
- 314 **[asia/cambodia/\]](https://globalnutritionreport.org/resources/nutrition-profiles/asia/south-eastern-);** **Accessed on July 12, 2022. 2022.**
- 315 5. NIS: **National Institute of Statistics. Directorate General for HC. International ICF .**
- 316 **Cambodia Demographic and Health Survey 2014. Phnom Penh, Cambodia: National**
- 317 **Institute of Statistics/Cambodia, Directorate General for Health/Cambodia, and ICF**
- 318 **International; 2015. 2014.**
- 319 6. **World Food Programme in Cambodia;** **[\[https://www.wfp.org/countries/cambodia\]](https://www.wfp.org/countries/cambodia);**
- 320 **Accessed on July 13, 2022.**
- 321 7. Abrha S, Shiferaw S, Ahmed KY: **Overweight and obesity and its socio-demographic**
- 322 **correlates among urban Ethiopian women: evidence from the 2011 EDHS.** *BMC Public*
- 323 *Health* 2016, **16**(1):636.
- 324 8. Balarajan Y, Villamor E: **Nationally representative surveys show recent increases in the**
- 325 **prevalence of overweight and obesity among women of reproductive age in Bangladesh,**
- 326 **Nepal, and India.** *The journal of nutrition* 2009, **139**(11):2139-2144.
- 327 9. Oddo VM, Bleich SN, Pollack KM, Surkan PJ, Mueller NT, Jones-Smith JC: **The weight of**
- 328 **work: the association between maternal employment and overweight in low-and middle-**
- 329 **income countries.** *International Journal of Behavioral Nutrition and Physical Activity* 2017,
- 330 **14**(1):1-10.
- 331 10. Lopez LM, Bernholc A, Chen M, Grey TW, Otterness C, Westhoff C, Edelman A, Helmerhorst
- 332 **FM: Hormonal contraceptives for contraception in overweight or obese women.** *The*
- 333 *Cochrane database of systematic reviews* 2016, **2016**(8):Cd008452.
- 334 11. de Munter JS, Tynelius P, Magnusson C, Rasmussen F: **Longitudinal analysis of lifestyle habits**
- 335 **in relation to body mass index, onset of overweight and obesity: results from a large**
- 336 **population-based cohort in Sweden.** *Scandinavian journal of public health* 2015, **43**(3):236-
- 337 245.
- 338 12. Piirtola M, Jelenkovic A, Latvala A, Sund R, Honda C, Inui F, Watanabe M, Tomizawa R,
- 339 **Iwatani Y, Ordonana JR: Association of current and former smoking with body mass index:**
- 340 **A study of smoking discordant twin pairs from 21 twin cohorts.** *PloS one* 2018,
- 341 **13**(7):e0200140.
- 342 13. Chiolero A, Jacot S, Sadowski I, Faeh D, Paccaud F, Cornuz J: **Association of cigarettes smoked**
- 343 **daily with obesity in a general adult population.** *Obesity* 2007, **15**(5):1311-1318.



- 344 14. **DHS Program. The Demographic and Health Surveys (DHS) Program; ICF: Rockville,**  
345 **MD, USA, 2020; Available online: <https://dhsprogram.com/data/available-datasets.cfm>**  
346 **(accessed on 28 March 2022).**
- 347 15. **BOWLER P: CUNNINGHAM, A. and JARDINE, N.(editors). Romanticism and the**  
348 **sciences. Cambridge University Press, Cambridge: 1990. Pp xxii, 345; illustrated. Price:£**  
349 **15, US \$19.95. ISBN: 0-521-35685-7 (paperback). In.; 1992.**
- 350 16. **Organization WH: Physical status: The use of and interpretation of anthropometry, Report**  
351 **of a WHO Expert Committee: World Health Organization; 1995.**
- 352 17. **Um S, Chan YZC, Tol B, Sopheab H: Determinants of exclusive breastfeeding of infants**  
353 **under six months among Cambodian mothers. *Journal of pregnancy* 2020, 2020.**
- 354 18. **Bursac Z, Gauss CH, Williams DK, Hosmer DW: Purposeful selection of variables in logistic**  
355 **regression. *Source code for biology and medicine* 2008, 3(1):1-8.**
- 356 19. **Um S, Sopheab H, Yom A, Muir JA: Trends and factors associated with anemia among**  
357 **pregnant women aged 15-49 years old in Cambodia: Data analysis of the Cambodia**  
358 **Demographic and Health Surveys. *medRxiv* 2022:2022.2009.2008.22279710.**
- 359 20. **Biswas T, Uddin MJ, Mamun AA, Pervin S, P Garnett S: Increasing prevalence of overweight**  
360 **and obesity in Bangladeshi women of reproductive age: Findings from 2004 to 2014. *PloS***  
361 ***one* 2017, 12(7):e0181080.**
- 362 21. **Alemu E, Atnafu A, Yitayal M, Yimam K: Prevalence of overweight and/or obesity and**  
363 **associated factors among high school adolescents in Arada Sub city, Addis Ababa, Ethiopia.**  
364 ***Journal of nutrition & food sciences* 2014, 4(2):1.**
- 365 22. **Hamad R, Elser H, Tran DC, Rehkopf DH, Goodman SN: How and why studies disagree about**  
366 **the effects of education on health: A systematic review and meta-analysis of studies of**  
367 **compulsory schooling laws. *Social Science & Medicine* 2018, 212:168-178.**
- 368 23. **Chung A, Backholer K, Wong E, Palermo C, Keating C, Peeters A: Trends in child and**  
369 **adolescent obesity prevalence in economically advanced countries according to**  
370 **socioeconomic position: a systematic review. *Obesity reviews* 2016, 17(3):276-295.**
- 371 24. **Barlow P: The effect of schooling on women's overweight and obesity: A natural experiment**  
372 **in Nigeria. *Demography* 2021, 58(2):685-710.**
- 373 25. **McLaren L: Socioeconomic status and obesity. *Epidemiologic reviews* 2007, 29(1):29-48.**
- 374 26. **Liu H, Guo G: Lifetime socioeconomic status, historical context, and genetic inheritance in**  
375 **shaping body mass in middle and late adulthood. *American sociological review* 2015,**  
376 **80(4):705-737.**
- 377 27. **Mangemba NT, San Sebastian M: Societal risk factors for overweight and obesity in women**  
378 **in Zimbabwe: a cross-sectional study. *BMC public health* 2020, 20(1):1-8.**
- 379 28. **Kamal SM, Hassan CH, Alam GM: Dual burden of underweight and overweight among**  
380 **women in Bangladesh: patterns, prevalence, and sociodemographic correlates. *Journal of***  
381 ***health, population, and nutrition* 2015, 33(1):92.**
- 382 29. **Ghose B: Frequency of TV viewing and prevalence of overweight and obesity among adult**  
383 **women in Bangladesh: a cross-sectional study. *BMJ open* 2017, 7(1):e014399.**
- 384 30. **Islam M, Sathi NJ, Abdullah HM, Naime J, Butt ZA: Factors Affecting the Utilization of**  
385 **Antenatal Care Services During Pregnancy in Bangladesh and 28 Other Low-and Middle-**  
386 **income Countries: A Meta-analysis of Demographic and Health Survey Data. *Dr Sulaiman***  
387 ***Al Habib Medical Journal* 2022, 4(1):19-31.**

- 388 31. Mbochi RW, Kuria E, Kimiywe J, Ochola S, Steyn NP: **Predictors of overweight and obesity in**  
389 **adult women in Nairobi Province, Kenya.** *BMC public health* 2012, **12**(1):1-9.
- 390 32. Li W, Wang Y, Shen L, Song L, Li H, Liu B, Yuan J, Wang Y: **Association between parity and**  
391 **obesity patterns in a middle-aged and older Chinese population: a cross-sectional analysis**  
392 **in the Tongji-Dongfeng cohort study.** *Nutrition & metabolism* 2016, **13**(1):1-8.
- 393 33. Pasquali R, Vicennati V, Cacciari M, Pagotto U: **The hypothalamic-pituitary-adrenal axis**  
394 **activity in obesity and the metabolic syndrome.** *Annals of the New York Academy of Sciences*  
395 2006, **1083**(1):111-128.
- 396
